# Supplementary figures and images for: Barcoding (COI) Sea Cucumber Holothuria mammata Distribution Analysis: Adriatic Rare or Common Species?
Source: MDPI journal article supplement (doi:10.3390/genes14112059), 2023-11-09

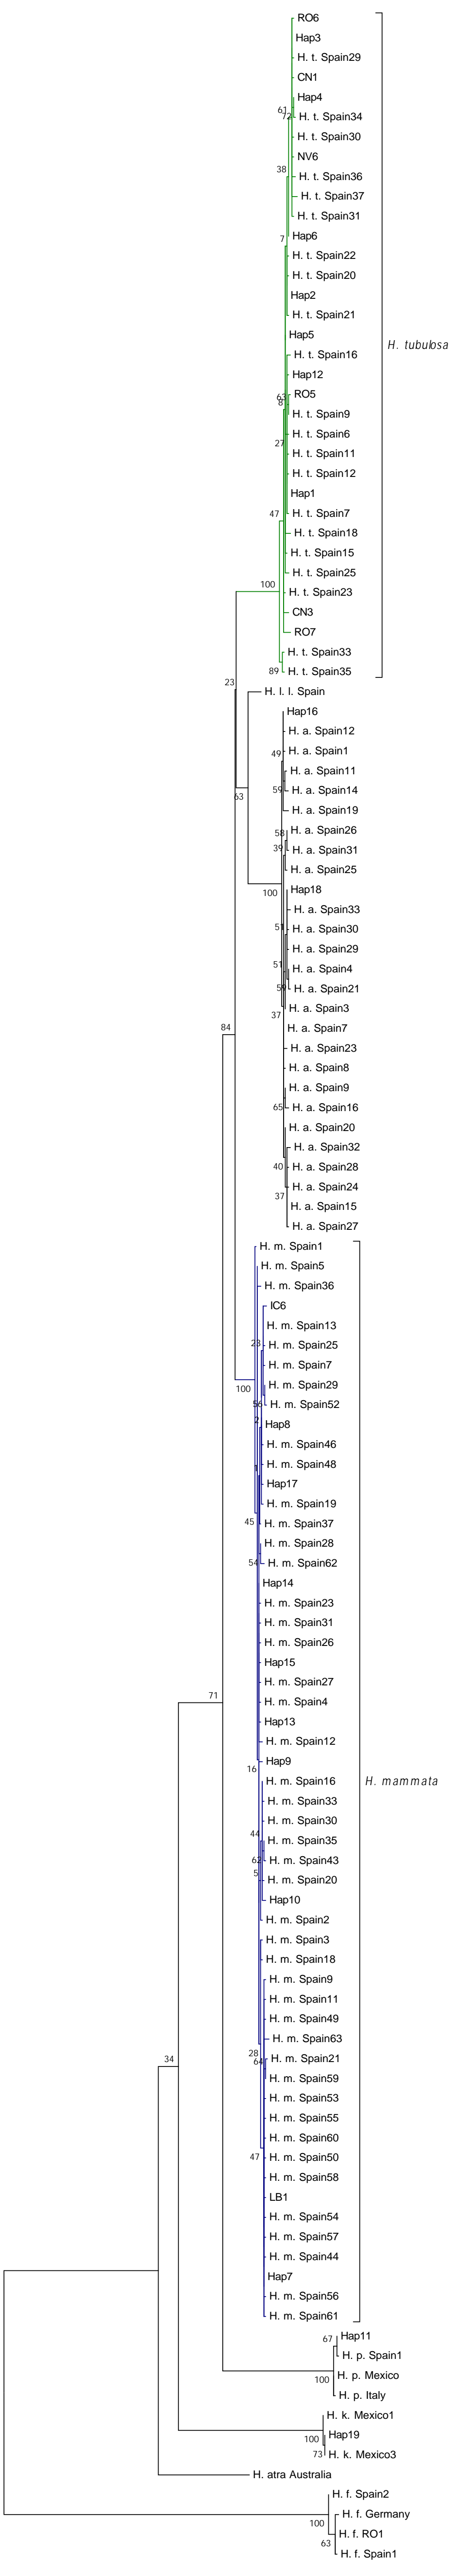

Supplement: s1 [file s1]
